# Supplementary material
Source: publisher figshare collection journal article supplement (https://frontiersin.figshare.com/ndownloader/files/28860138)
Supplement: Supplementary file 1 [file 28860138]

Supplementary Material

# Appendices

[Appendix A]

| **Digital Scientist 2035 – An Outlook on Innovation and Education**  **Survey Questions** |
| --- |
| 1. Age 2. Sex 3. OVGU Faculty 4. Academic position 5. Covid-19 pandemic forced the need to switch toward home-working. How impactful was this event on your research work? Rate your answer (1 = not at all impactful, 3 = neutral, 5 = very  impactful) 6. How likely would you continue your research at home-office? Rate your answer (1 = very unlikely, 3 = neutral, 5 = very likely) 7. How would you imagine to be the future of scientists and the way of conducting scientific research? Think ahead in 2035… (Select the most 3 meaningful options) 8. Which innovative technology would you integrate in your current research work to embrace the era of "digital science"? Think ahead in 2035… (Select the most 3 meaningful options) 9. How likely will ethics and regulatory procedures change due to the increasing implementation of technologies (e.g., AI, robots, avatars)? Rate your answer (1 = very unlikely, 3 = neutral, 5 = very likely) 10. How likely will technologies improve the execution of experiments (e.g., precision, time, quality, quantity, replicability)? Rate your answer (1 = very unlikely, 3 = neutral, 5 = very likely) 11. How likely would you be willing to share your research work with worldwide teams throughout the use of channel-based messaging/meeting platforms? Rate your answer (1 = very unlikely, 3 = neutral, 5 = very likely) 12. Which are the most relevant advantages of "digital science"? (Select the most 3 relevant options) 13. Ideally, how likely would you think that human/animal experiments will be replaced by high precision simulation with AI? Think ahead in 2035… Rate your answer (1 = very unlikely, 3 = neutral, 5 = very likely) 14. How likely will education be influenced by digitalization and the adoption of technologies? Rate your answer (1 = very unlikely, 3 = neutral, 5 = very likely) 15. Describe in one word your opinion/feeling about "Digital Science". |

[Appendix B]

| **Digital Scientist 2035 – An Outlook on Innovation and Education**  **Survey Answers** |
| --- |
| ●      18-24  ●      25-34  ●      35-50  ●      >50 |
| - Male - Female - Diverse |
|  Medicine   Mechanical Engineering   Process & Systems Engineering   Electrical Engineering & Inf. Technology   Computer Science   Mathematics   Natural Sciences   - Humanities, Social Sc. & Education - Economics & Management |
| - B.Sc. / M.Sc. Student - Research Assistant - Ph.D. Student - PostDoc Researcher - Principal Investigator - Professor |
| 5-points Likert scale |
| 5-points Likert scale |
| - Artificial Intelligence (AI) manages massive datasets (i.e., several data analysis done in parallel) - Robots run experiments - Global collaborations using channel-based messaging platforms - Lectures, workshops, courses, and meetings happening entirely online - Change in ethical regulations and regulatory approvals - Revision of "Good Scientific Practice" procedures - Different management of research funds/different research costs - Easy replication of experimental procedures among Labs (e.g., using AI or robots) - No more laboratory experiments on humans/animals (i.e., ideally, precise simulations with AI) - Revised education (e.g., more digital and technology skills, interdisciplinary education) - Virtual Labs - Other |
| - Digital Healthcare - Virtual Reality / Augmented Reality - Artificial Intelligence (or Machine Learning, Deep Learning) - 3D or 4D Printing - Robotics - Brain-Computer Interfaces - (Health) Wearables - Voice Assistant or Avatars - New Touch Interfaces - Minimal / Non- Invasive Therapy Systems - Environmental Protection and Sustainability - Data Management / Cybersecurity - Electronic and Sensors - Other |
| 5-points Likert scale |
| 5-points Likert scale |
| 5-points Likert scale |
| - Adoption of "Open Science" principles - Scientist acquires/develops more digital and technological skills - Research articles are written with AI technologies - Cloud computing - Big data is easy to manage - Democratization of technologies - Innovative technologies will enable advanced data analysis - "Smart" laboratories (virtual and cloud-based labs, co-working facilities, DIY spaces, real-time collaborations) - High precision in predicting scientific results using technologies - Less (or ideally no more) human/animal experiments due to high precision simulations with AI - Interdisciplinary education - Increased networking |
| 5-points Likert scale |
| 5-points Likert scale |
| Short-answer text |
